# Supplementary material for: Substitution to Position Number 2 of 4(3H)-Quinazolinone to Create New Derivatives and to Test the Antibacterial or Antifungal Effects
Source: MDPI journal article supplement (doi:10.3390/app12052710), 2022-03-05
Supplement: s1 [file s1]

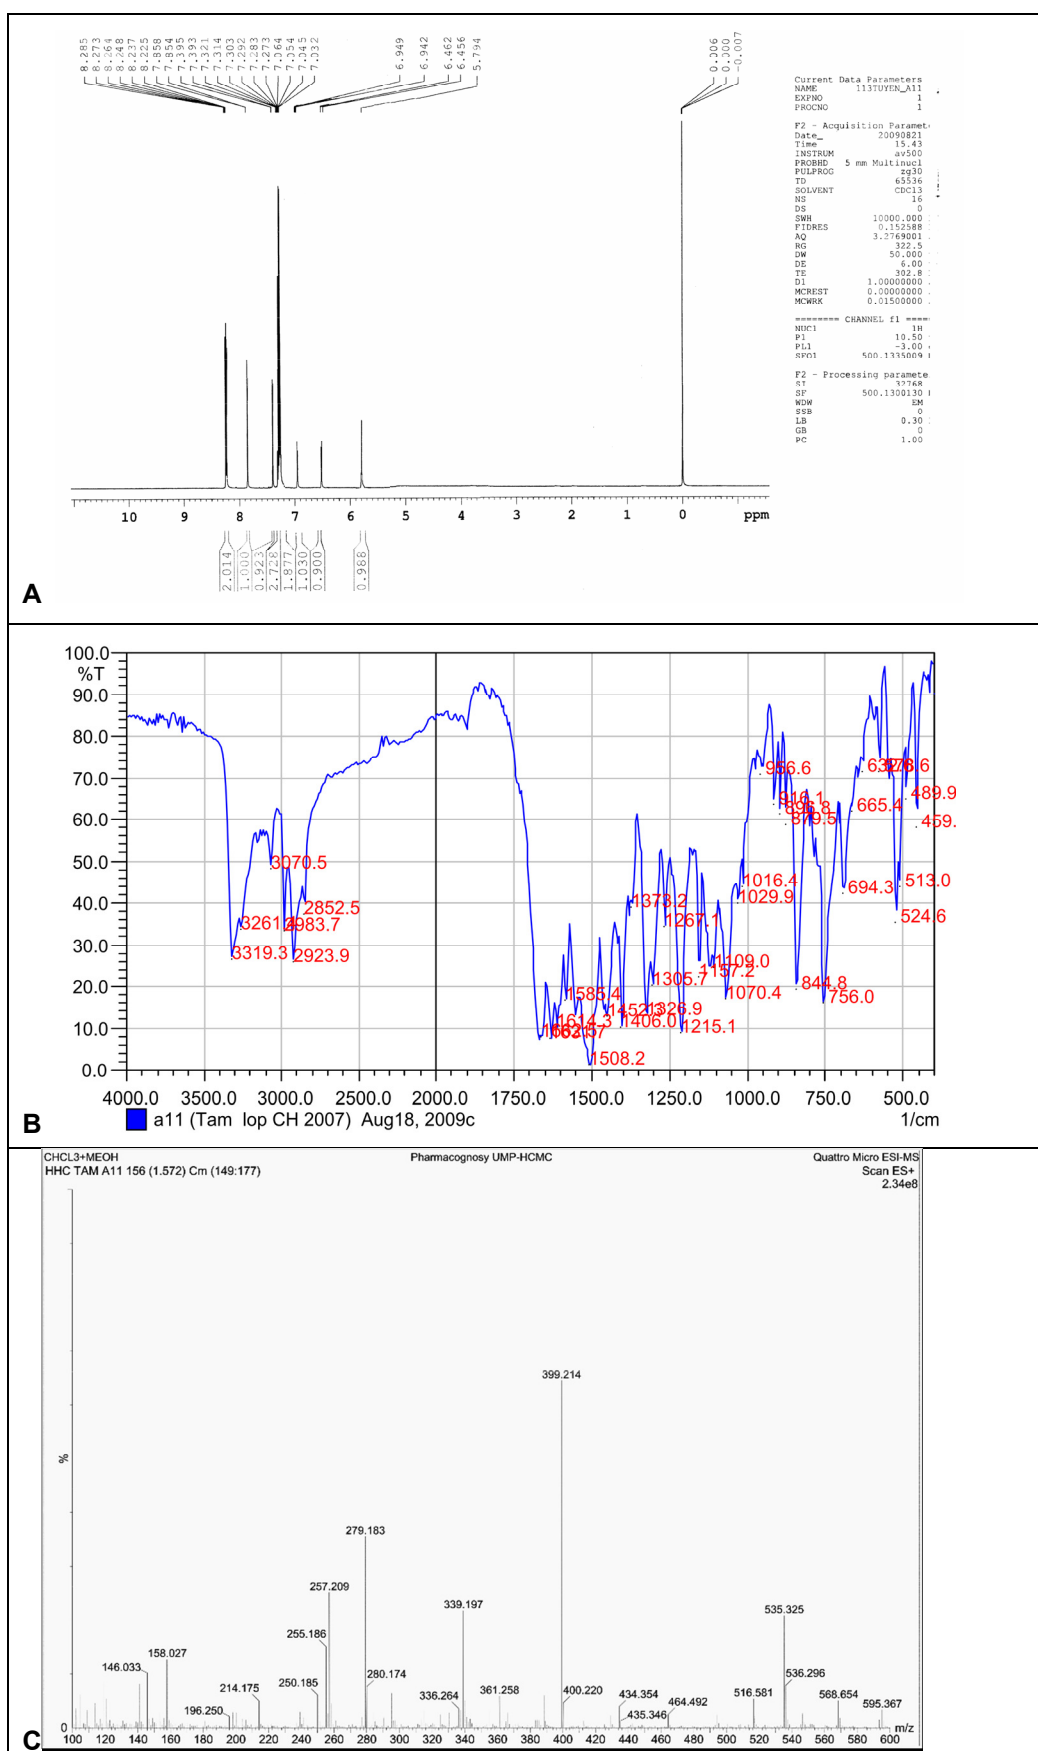

**Figure S1.**  $^1\text{H}$ -NMR, IR, and MS spectra of 2-(bromo(1H-imidazol-1-yl)methyl)-3-(p-fluorophenyl)-4(3H)-quinazolinon (**3a**)

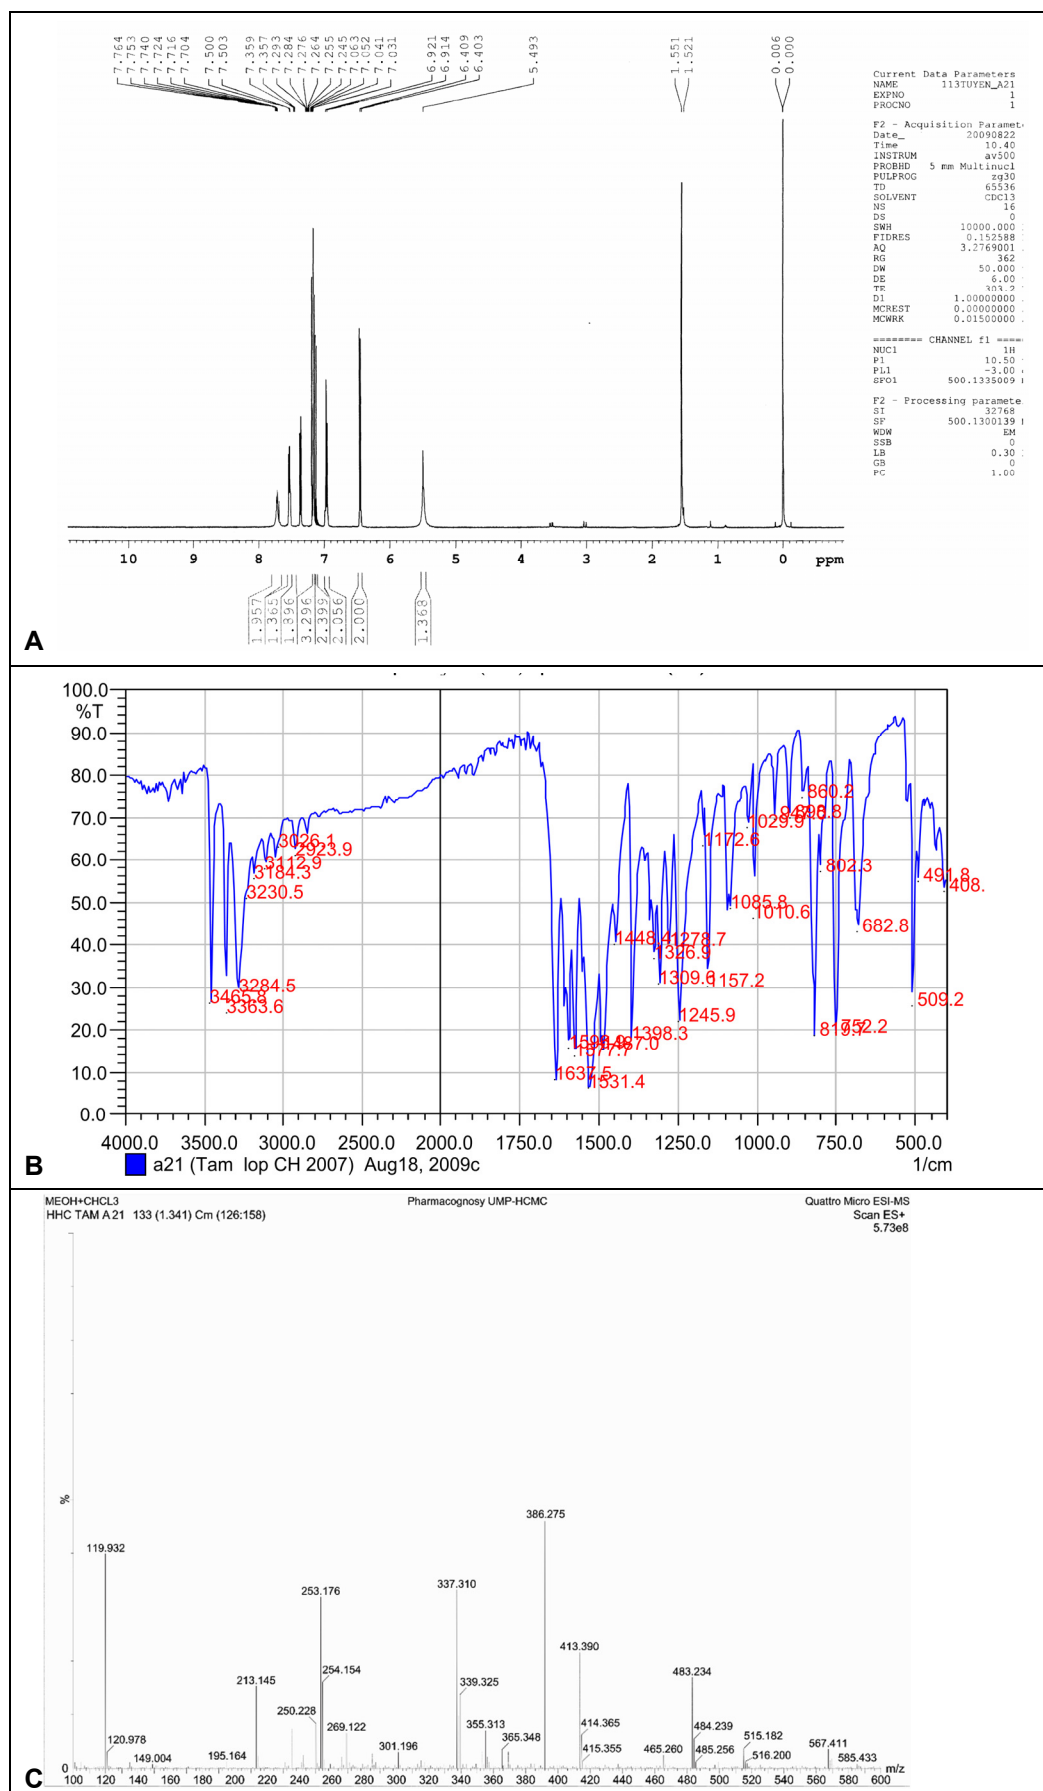

**Figure S2.**  $^1\text{H}$ -NMR, IR, and MS spectra of 2-(di(1H-imidazol-1-yl)methyl)-3-(pfluorophenyl)-4(3H)-quinazolinon (**3b**)

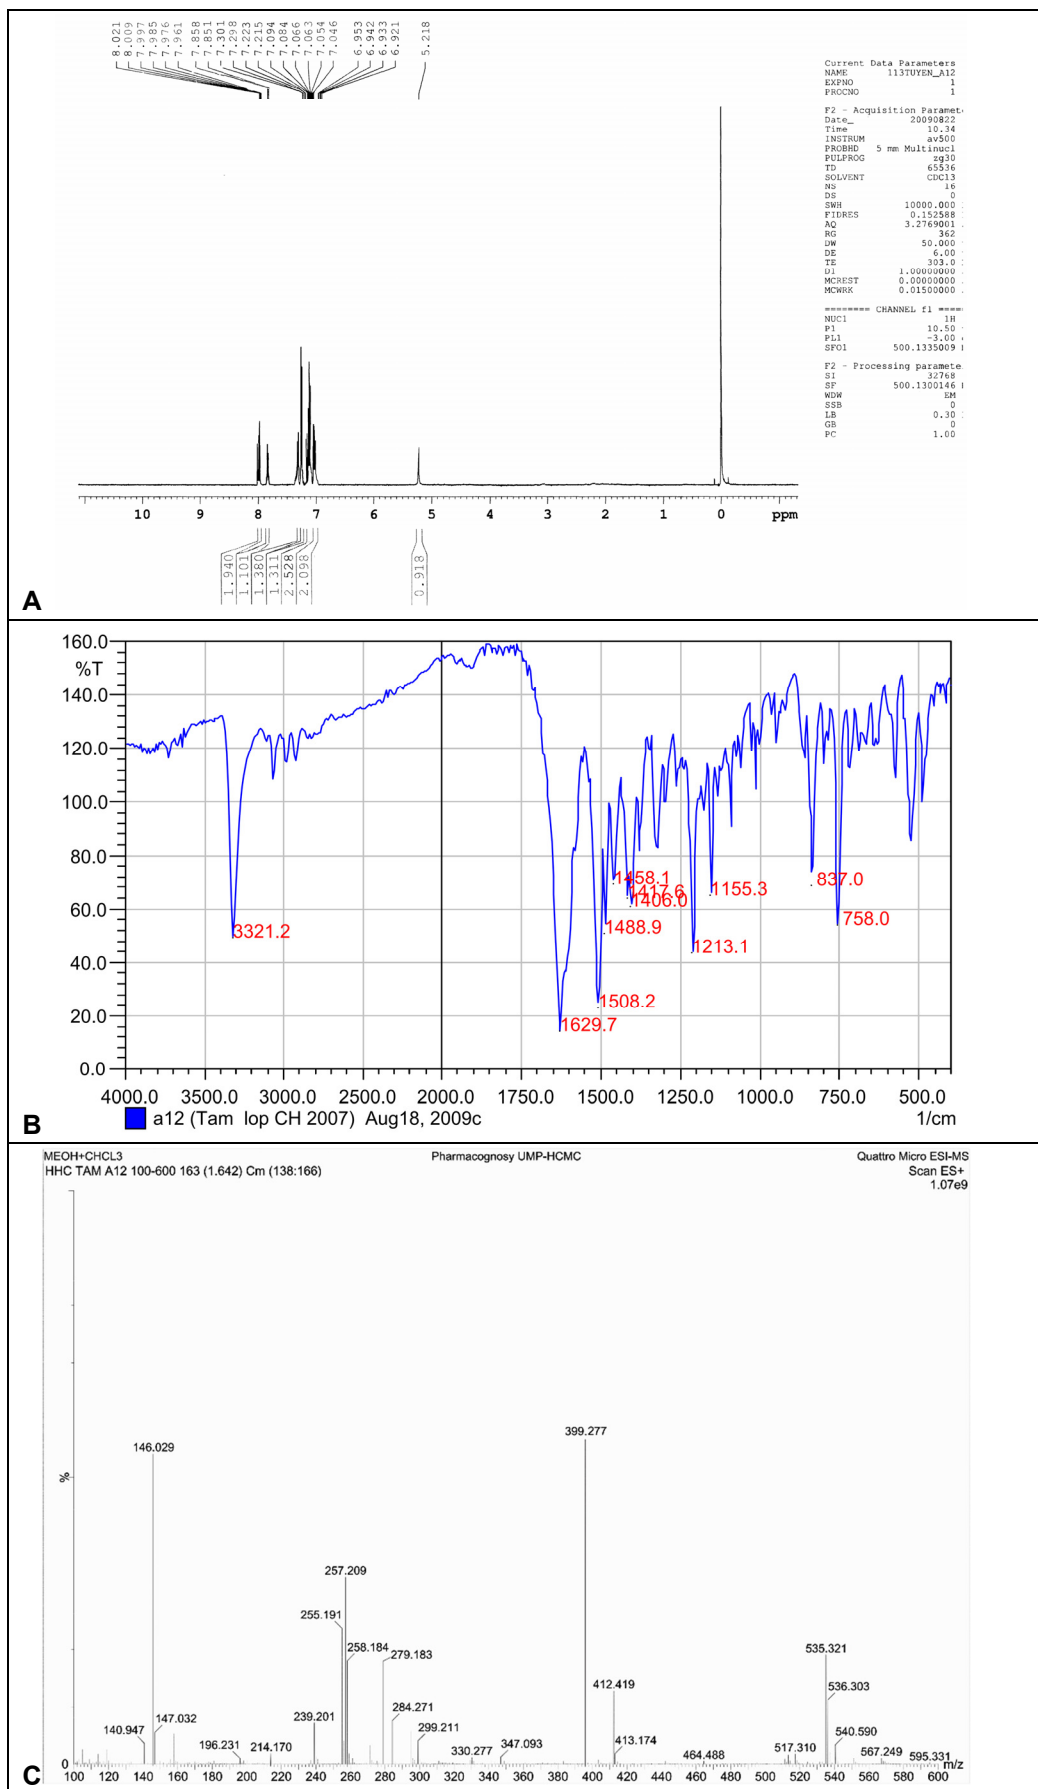

**Figure S3.**  $^1\text{H}$ -NMR, IR, and MS spectra of 2-(bromo(1H-triazol-1-yl)methyl)-3-(pfluorophenyl)-4(3H)-quinazolinon (**3c**)

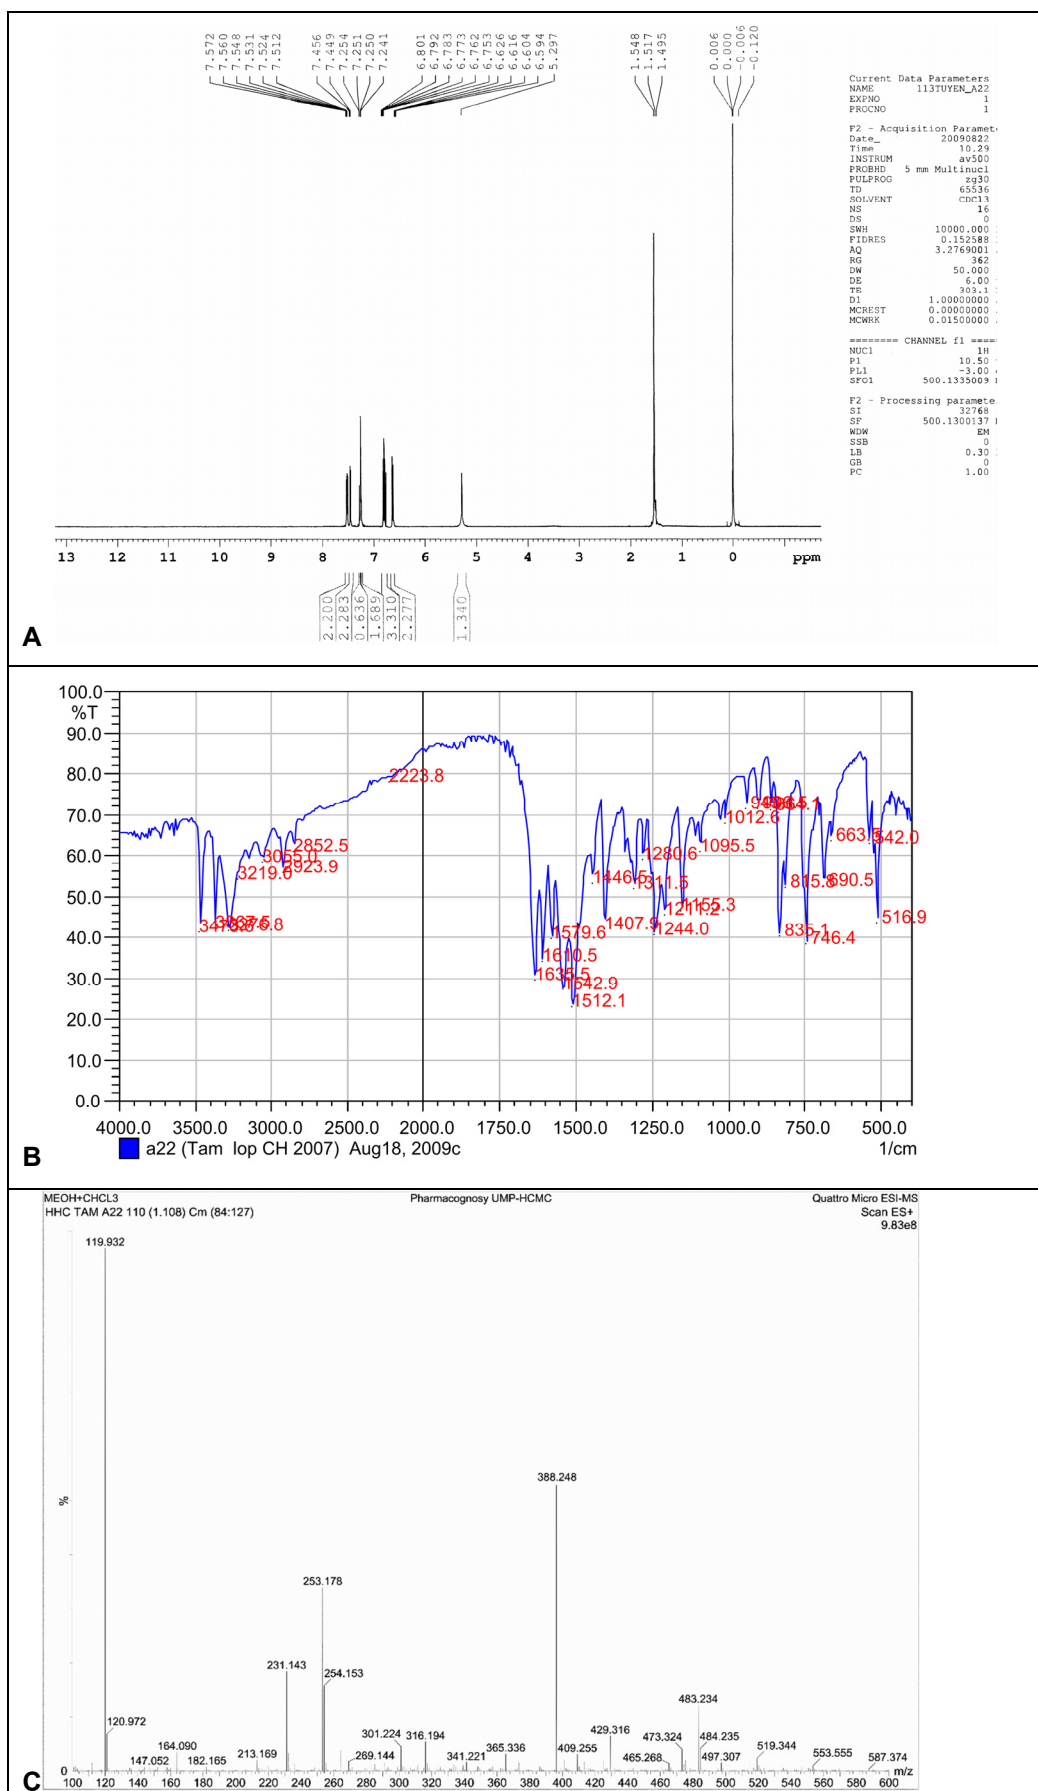

**Figure S4.**  $^1\text{H}$ -NMR, IR, and MS spectra of 2-(di(1H-triazol-1-yl)methyl)-3-(p-fluorophenyl)-4(3H)-quinazolinon (**3d**)

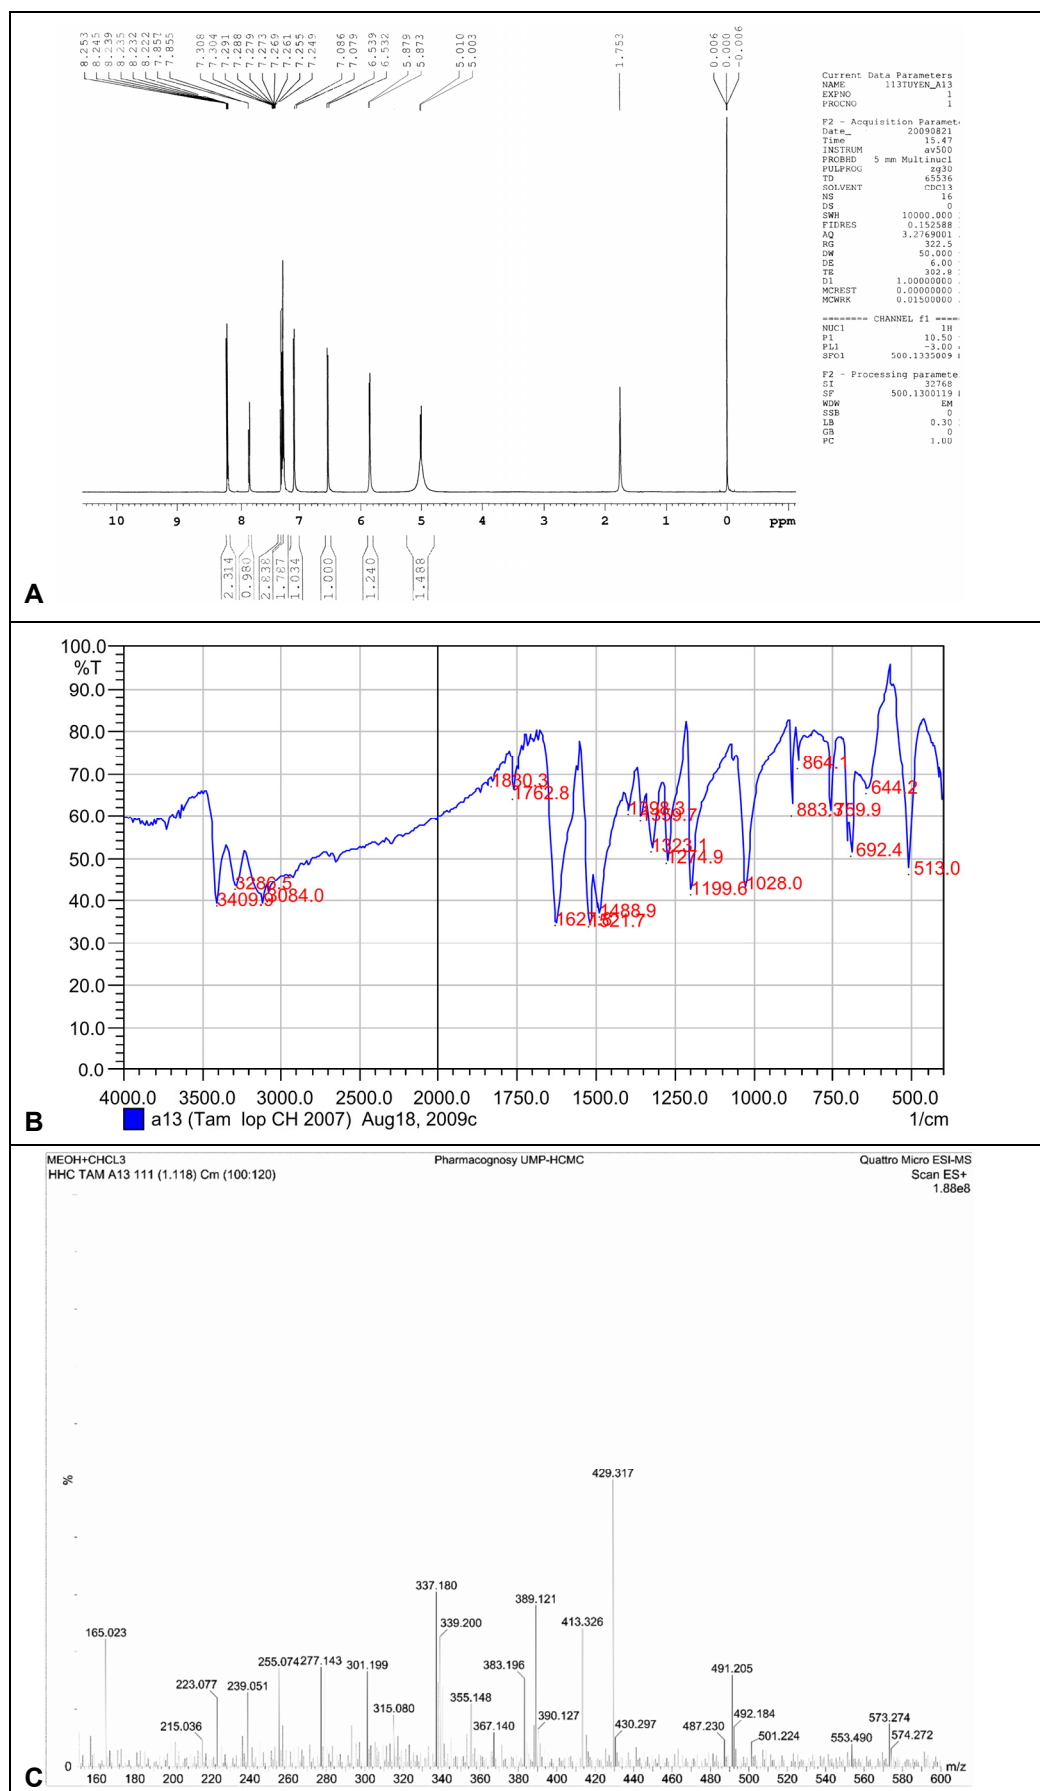

**Figure S5.**  $^1\text{H}$ -NMR, IR, and MS spectra of 2-(bromo-(thiazol-2-ylamino)methyl)-3-(pfluorophenyl)-4(3H)-quinazolinon (**3e**)

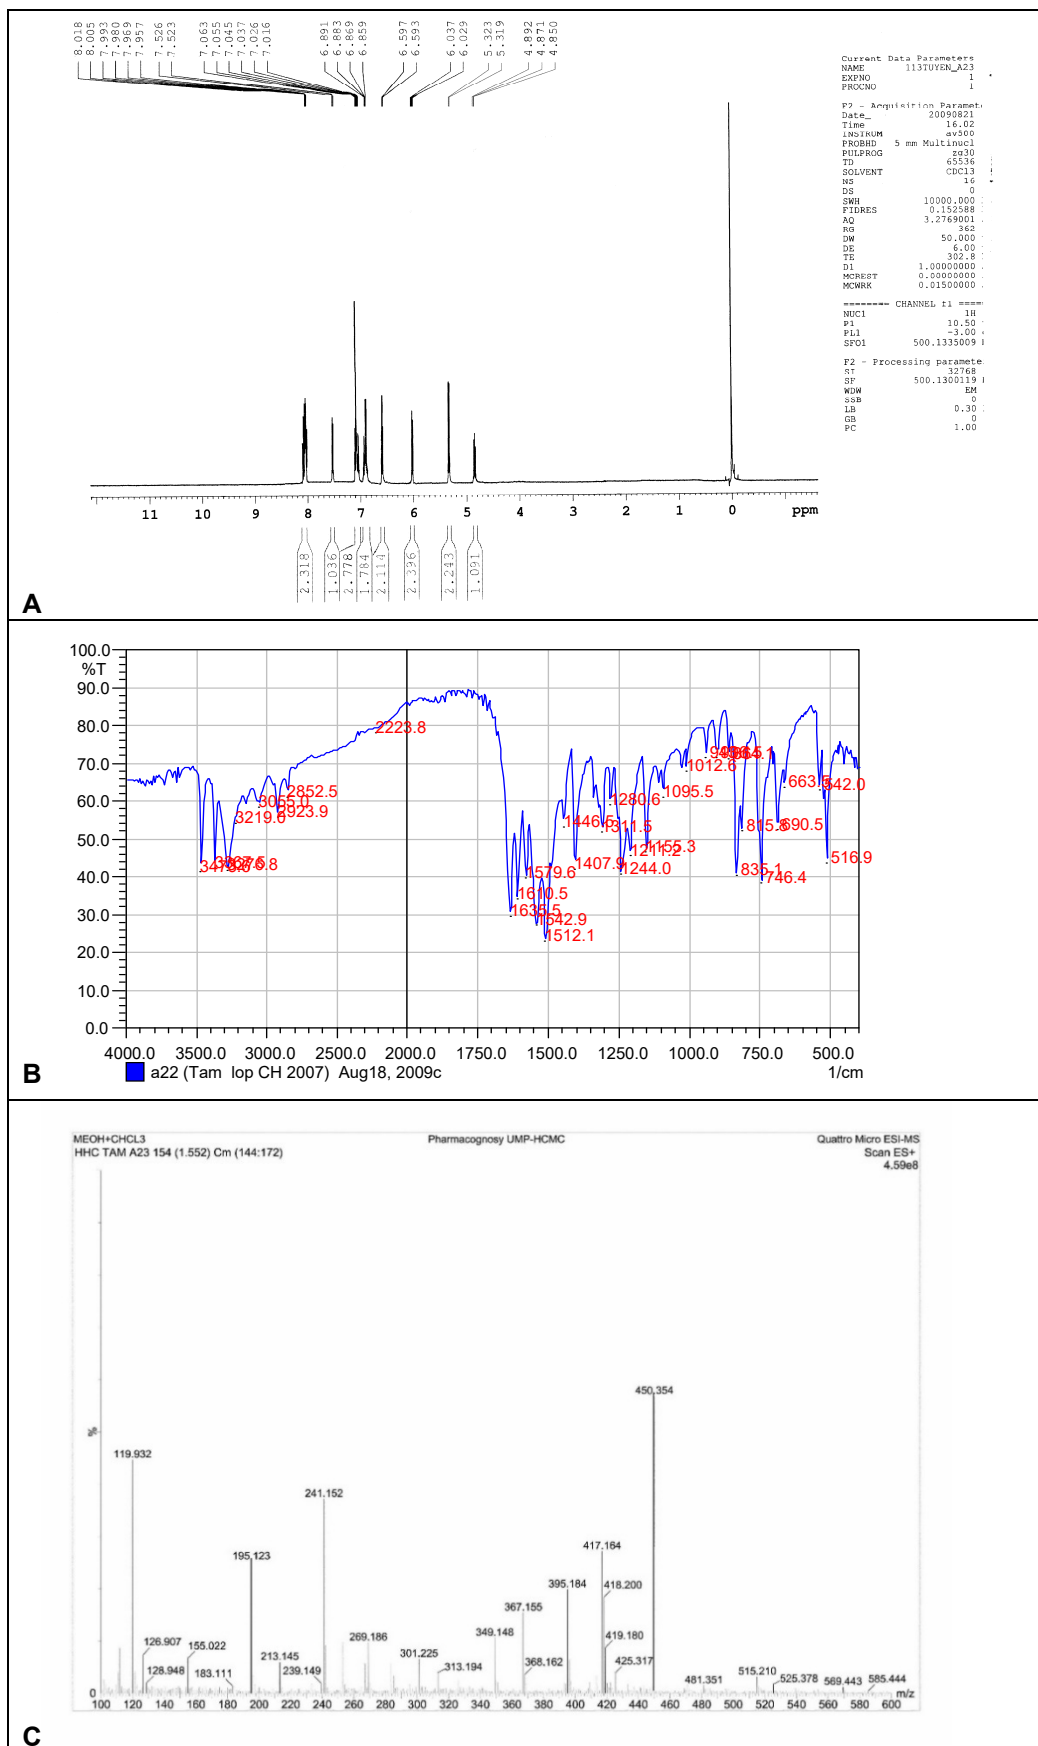

**Figure S6.**  $^1\text{H}$ -NMR, IR, and MS spectra of 2-(di(thiazol-1-ylamino)methyl)-3-(*p*-fluorophenyl)-4(3*H*)-quinazolinon (**3f**)

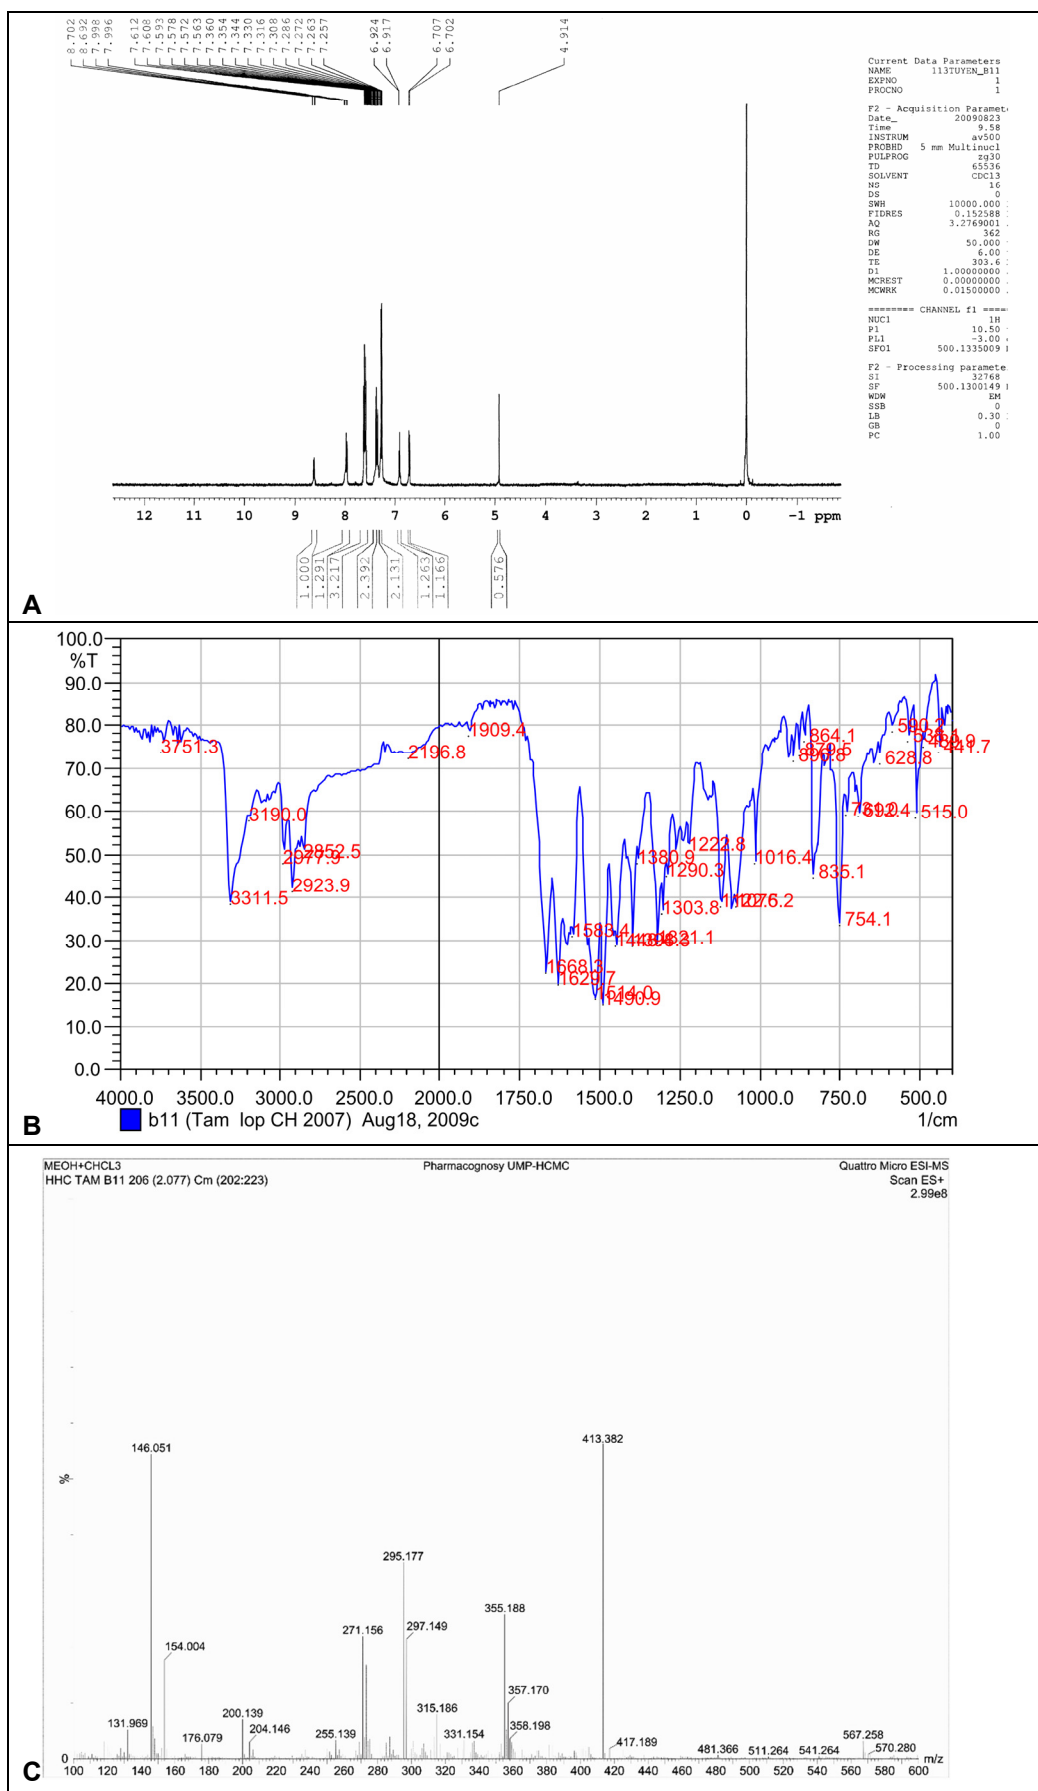

**Figure S7.**  $^1\text{H}$ -NMR, IR, and MS spectra of 2-(bromo-(1H-imidazol-1-yl)methyl)-3-(pchlorophenyl)-4(3H)-quinazolinon (**3g**)

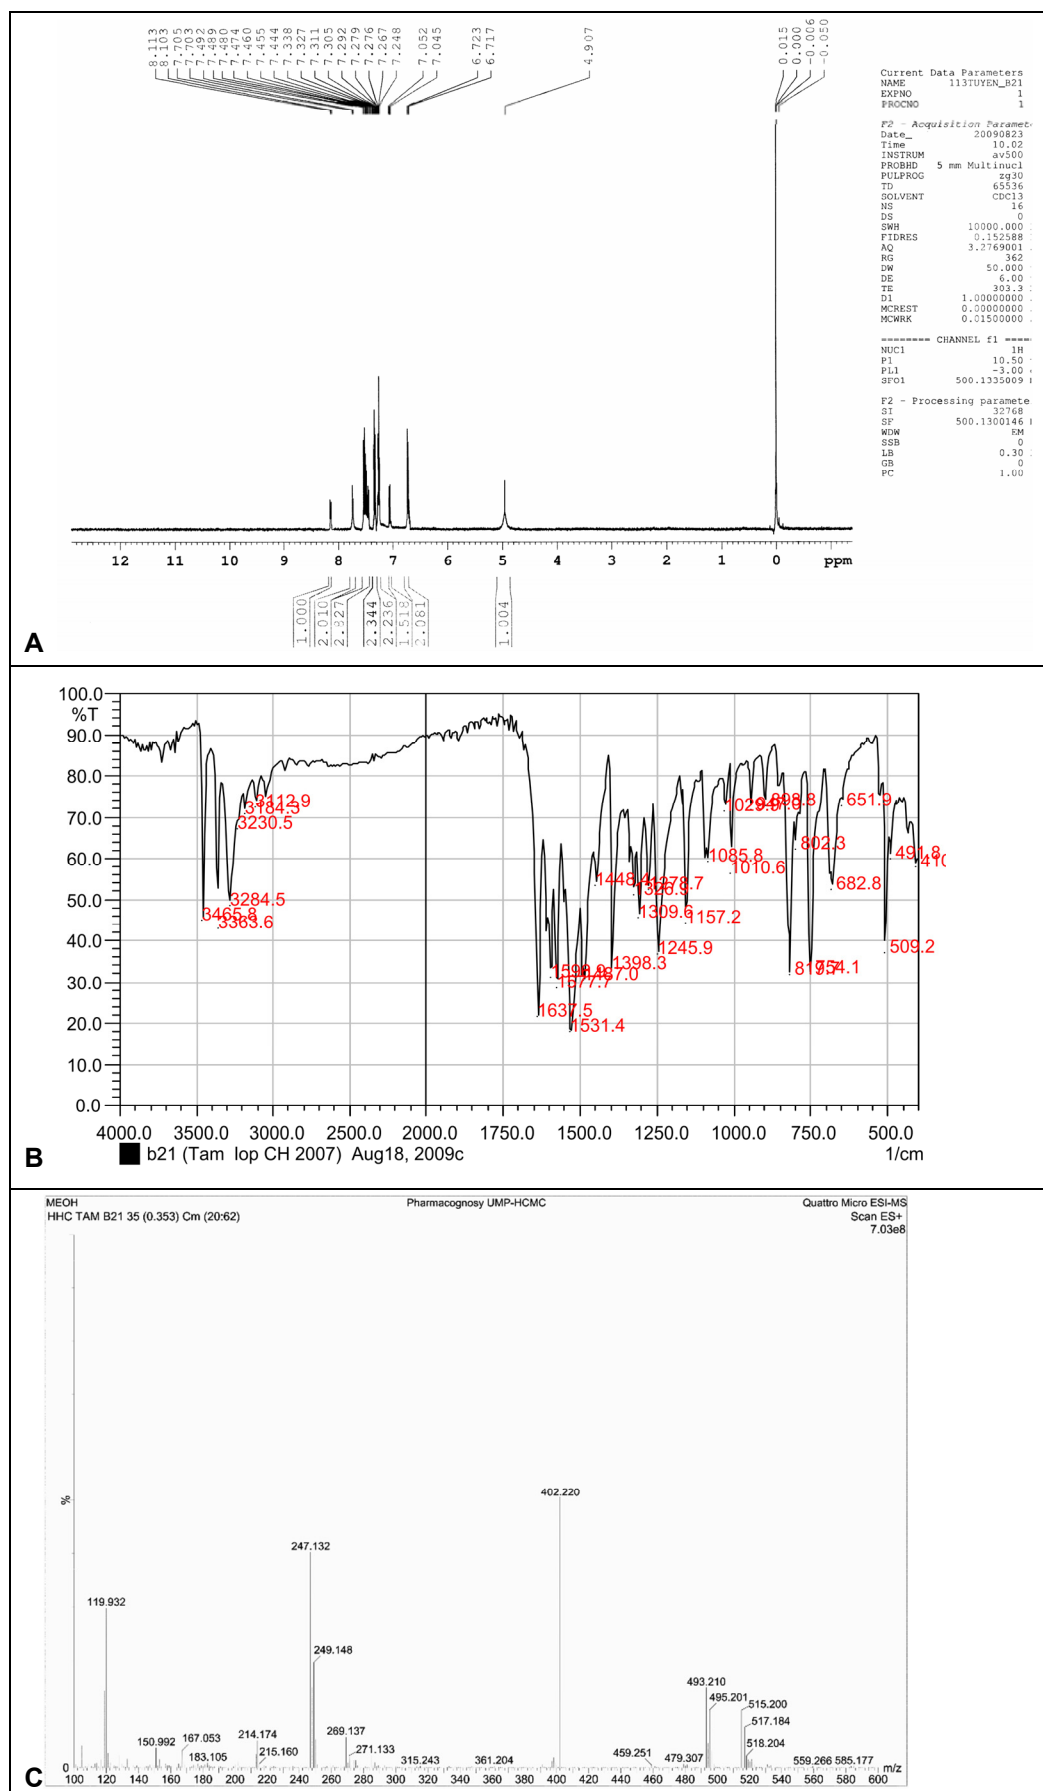

**Figure S8.**  $^1\text{H}$ -NMR, IR, and MS spectra of 2-(di(1H-imidazol-1-yl)methyl)-3-(pchlorophenyl)-4(3H)-quinazolinon (**3h**)



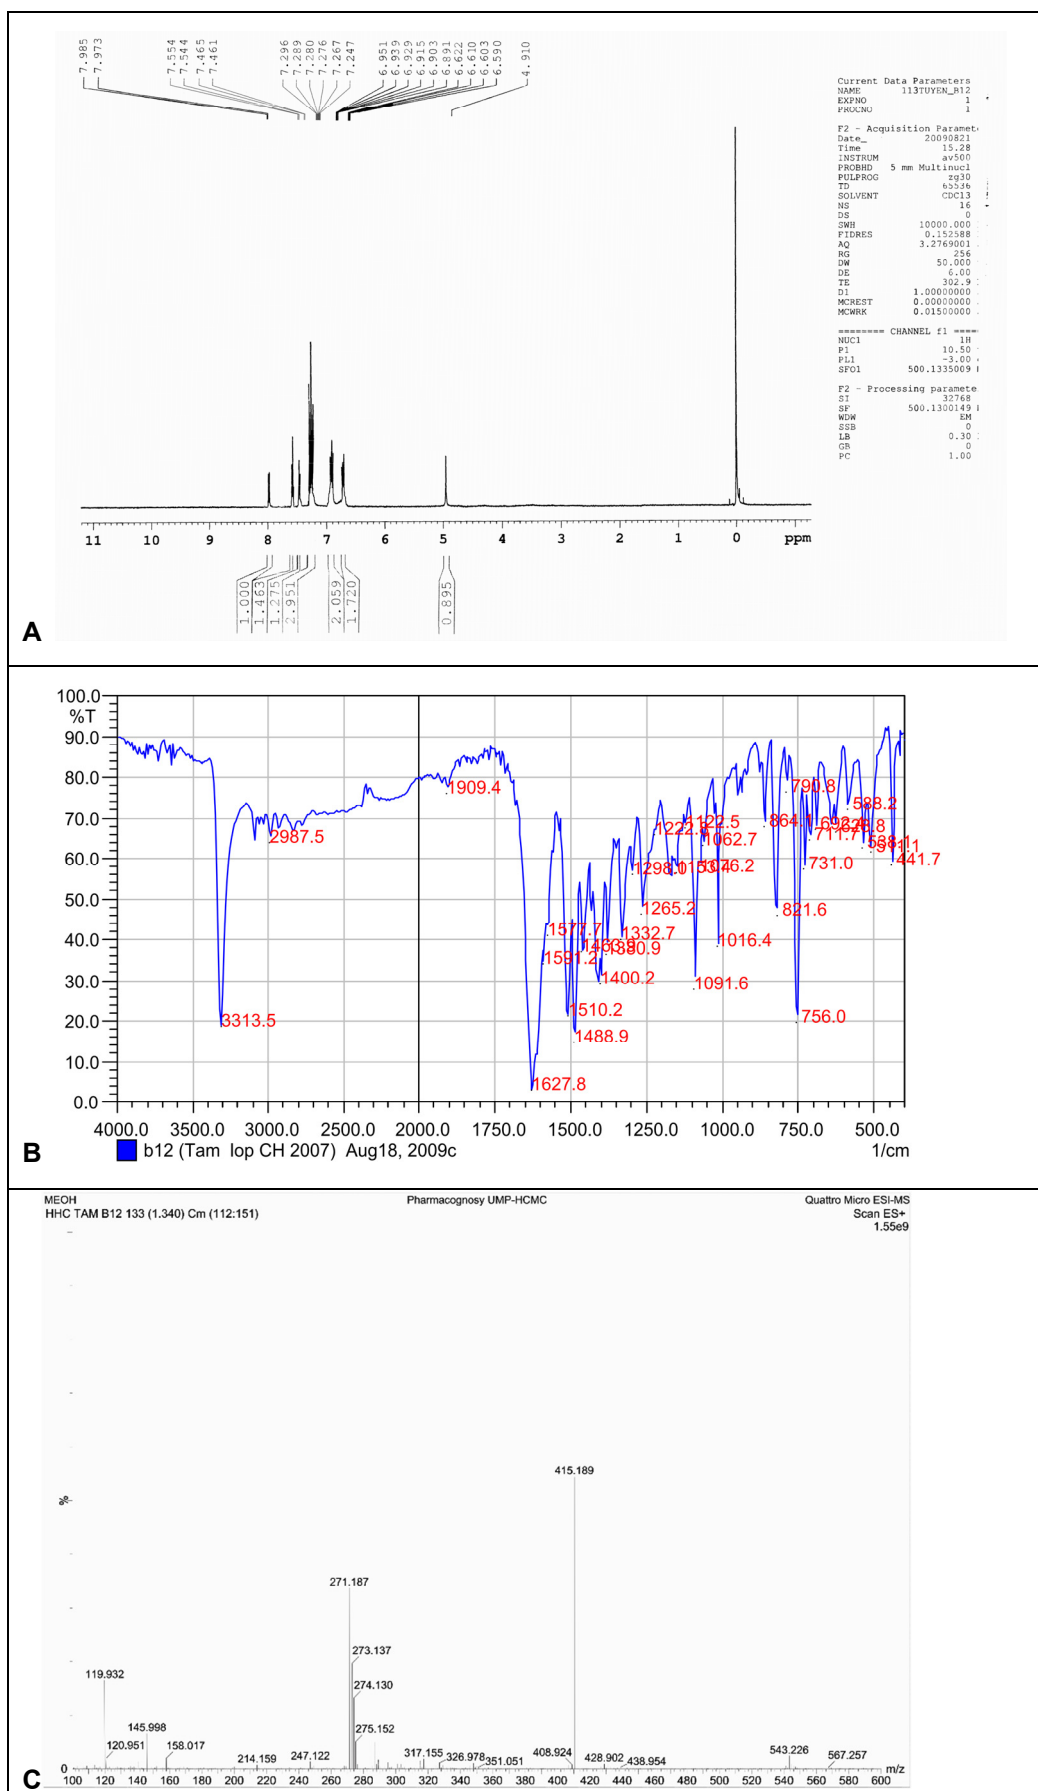

**Figure S9.**  $^1\text{H}$ -NMR, IR, and MS spectra of 2-(bromo(1H-triazol-1-yl)methyl)-3(p-chlorophenyl)-4(3H)-quinazolinon (**3i**)



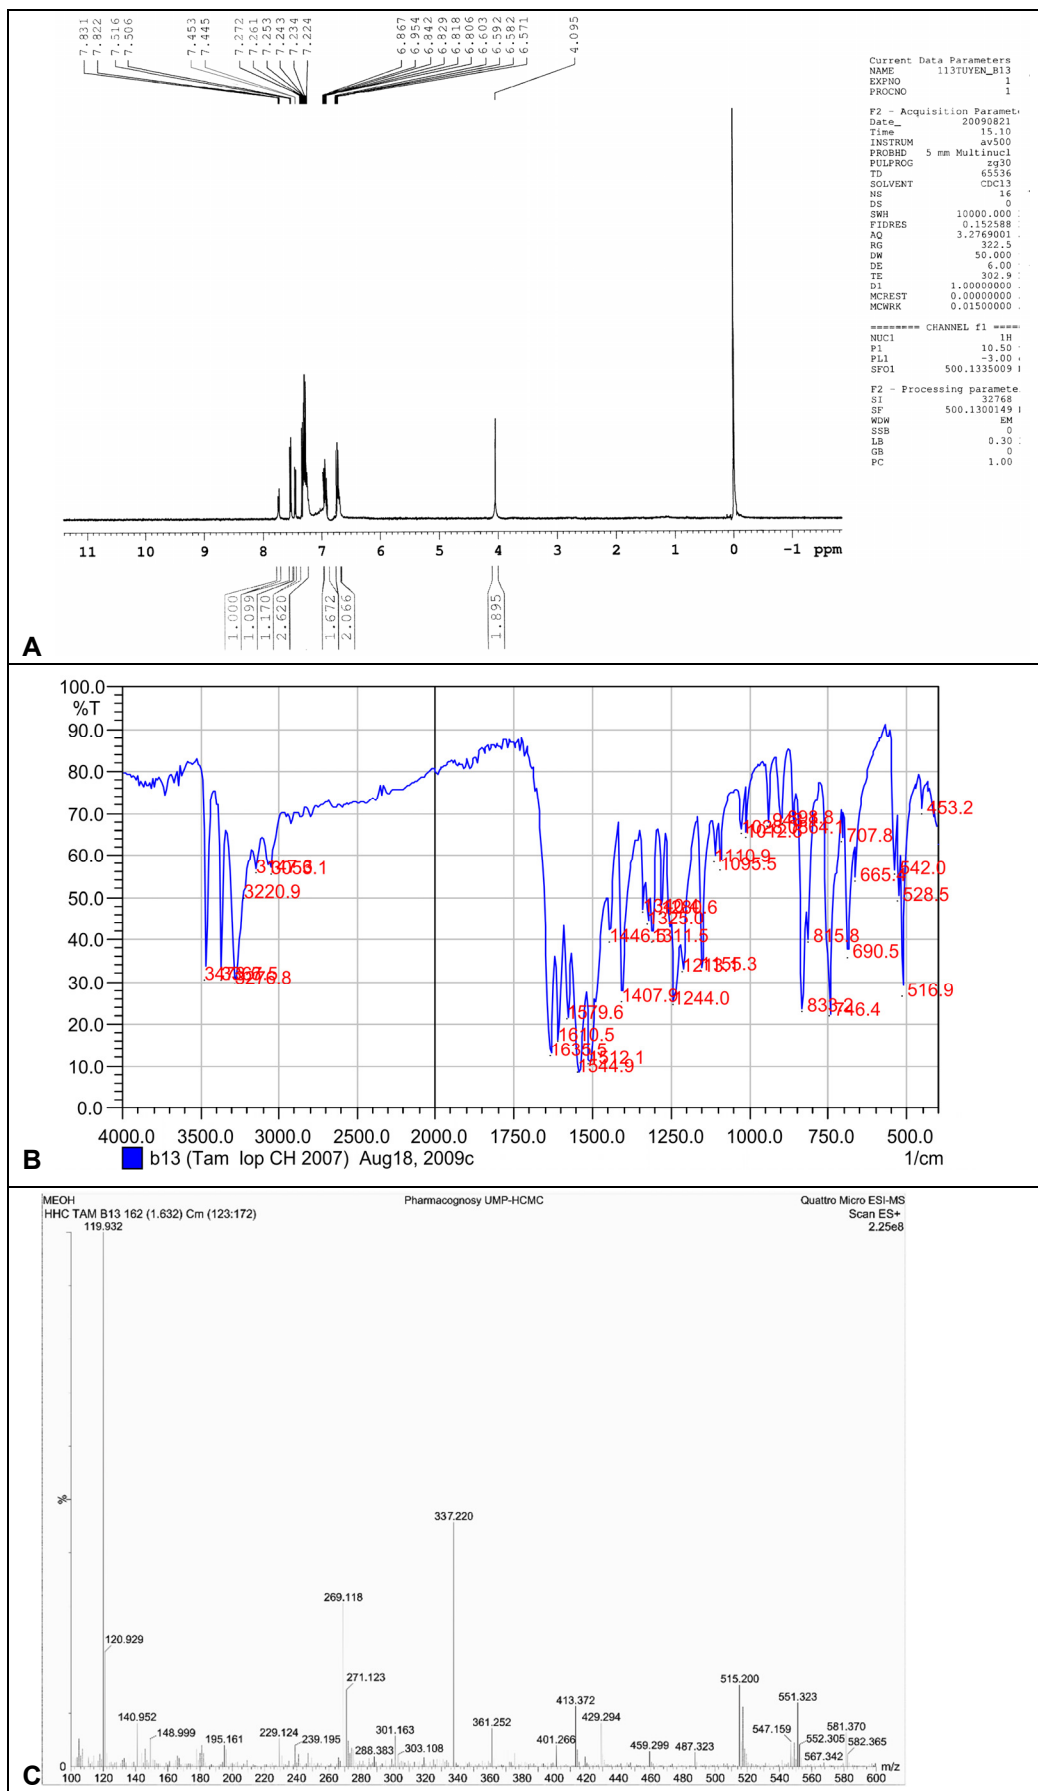

Figure S11.  $^1\text{H}$ -NMR, IR, and MS spectra of 2-((triazol-1-yl)methyl)-3-(p-chlorophenyl)-4(3H)-quinazolinon (**3k**)

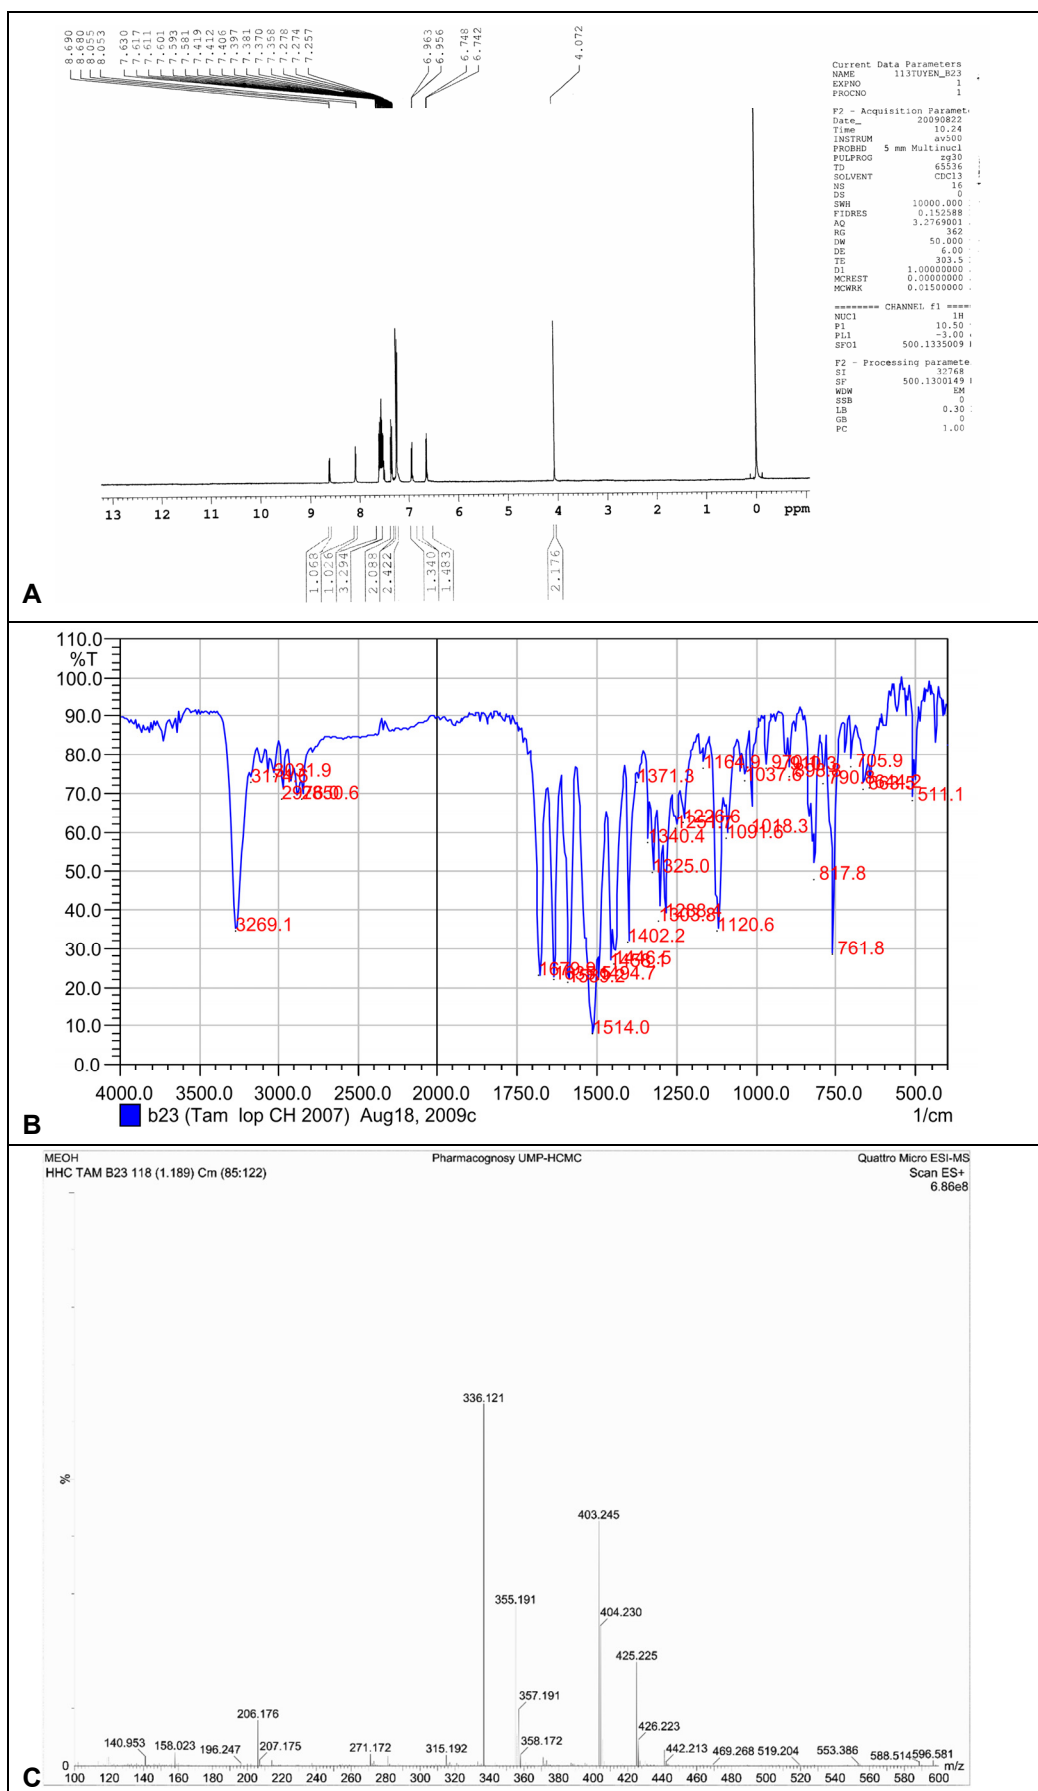

**Figure S12.**  $^1\text{H}$ -NMR, IR, and MS spectra of 2-((imidazol-1-yl)methyl)-3-(p-clorophenyl)-4(3H)-quinazolinon (**31**)

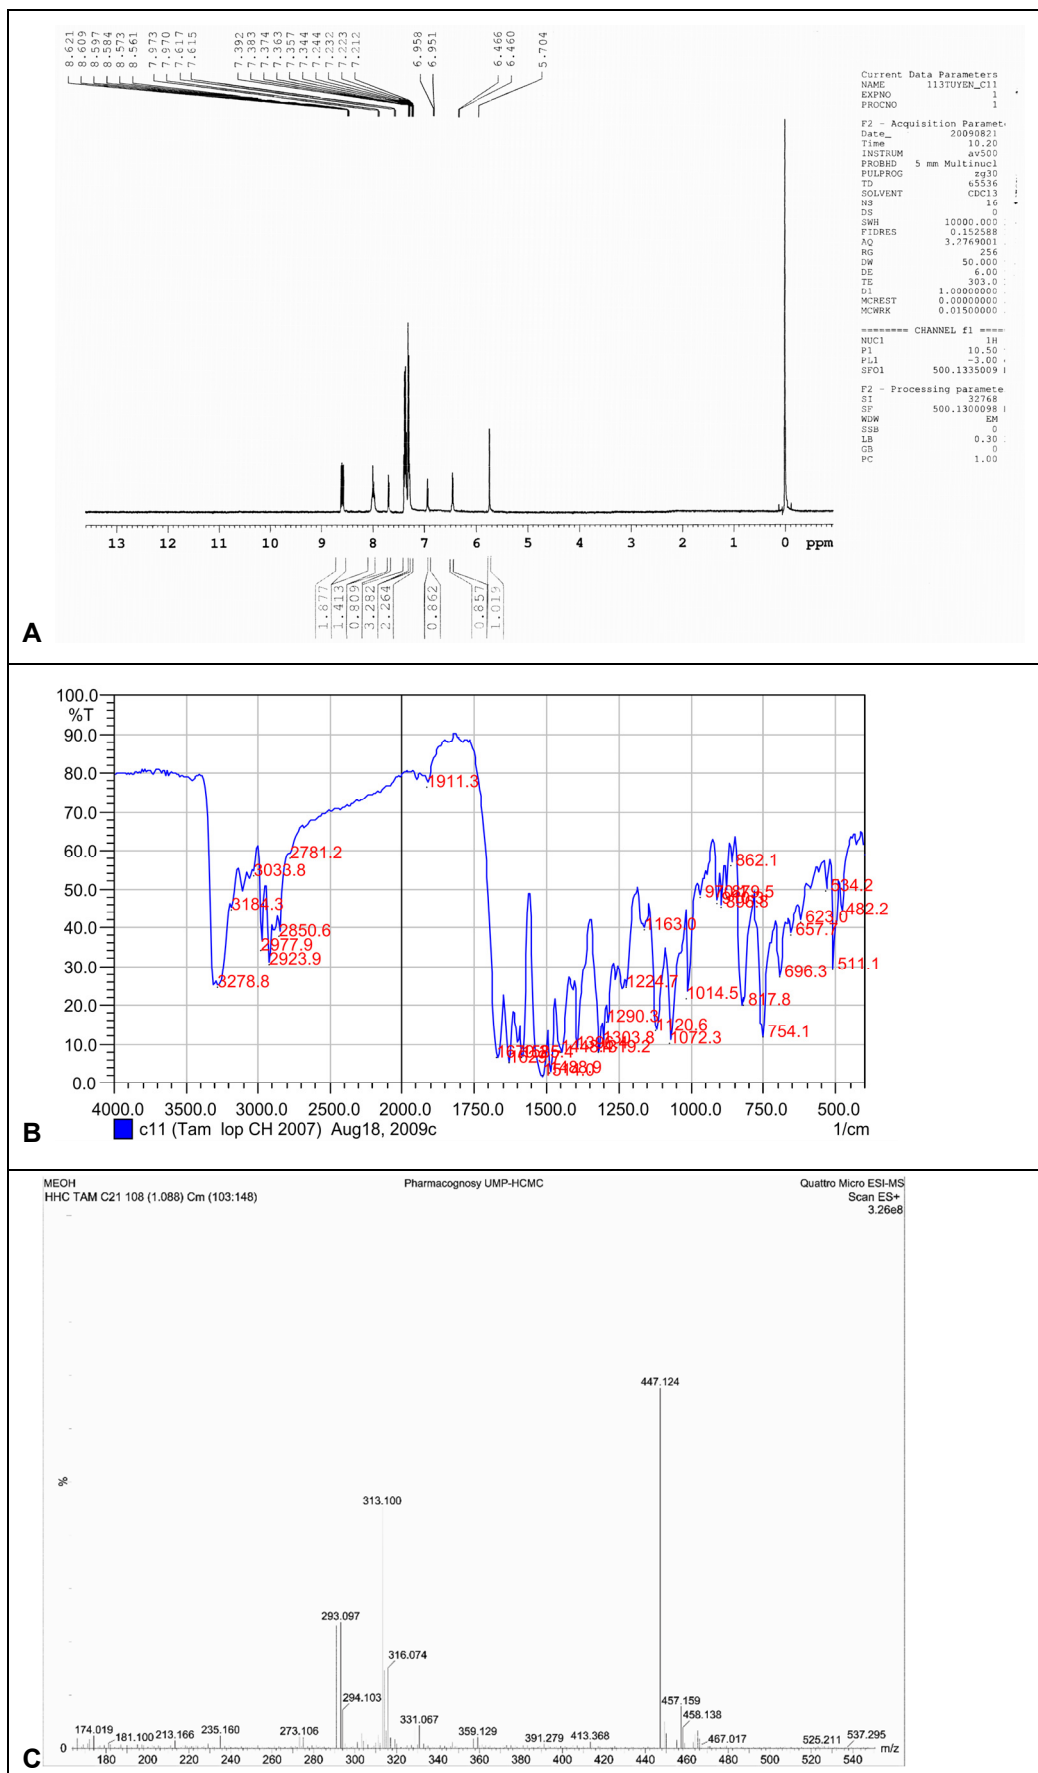

**Figure S13.**  $^1\text{H}$ -NMR, IR, and MS spectra of 2-(bromo-(1H-imidazol-1-yl)methyl)-3-(p-bromophenyl)-4(3H)-quinazolinon (**3n**)

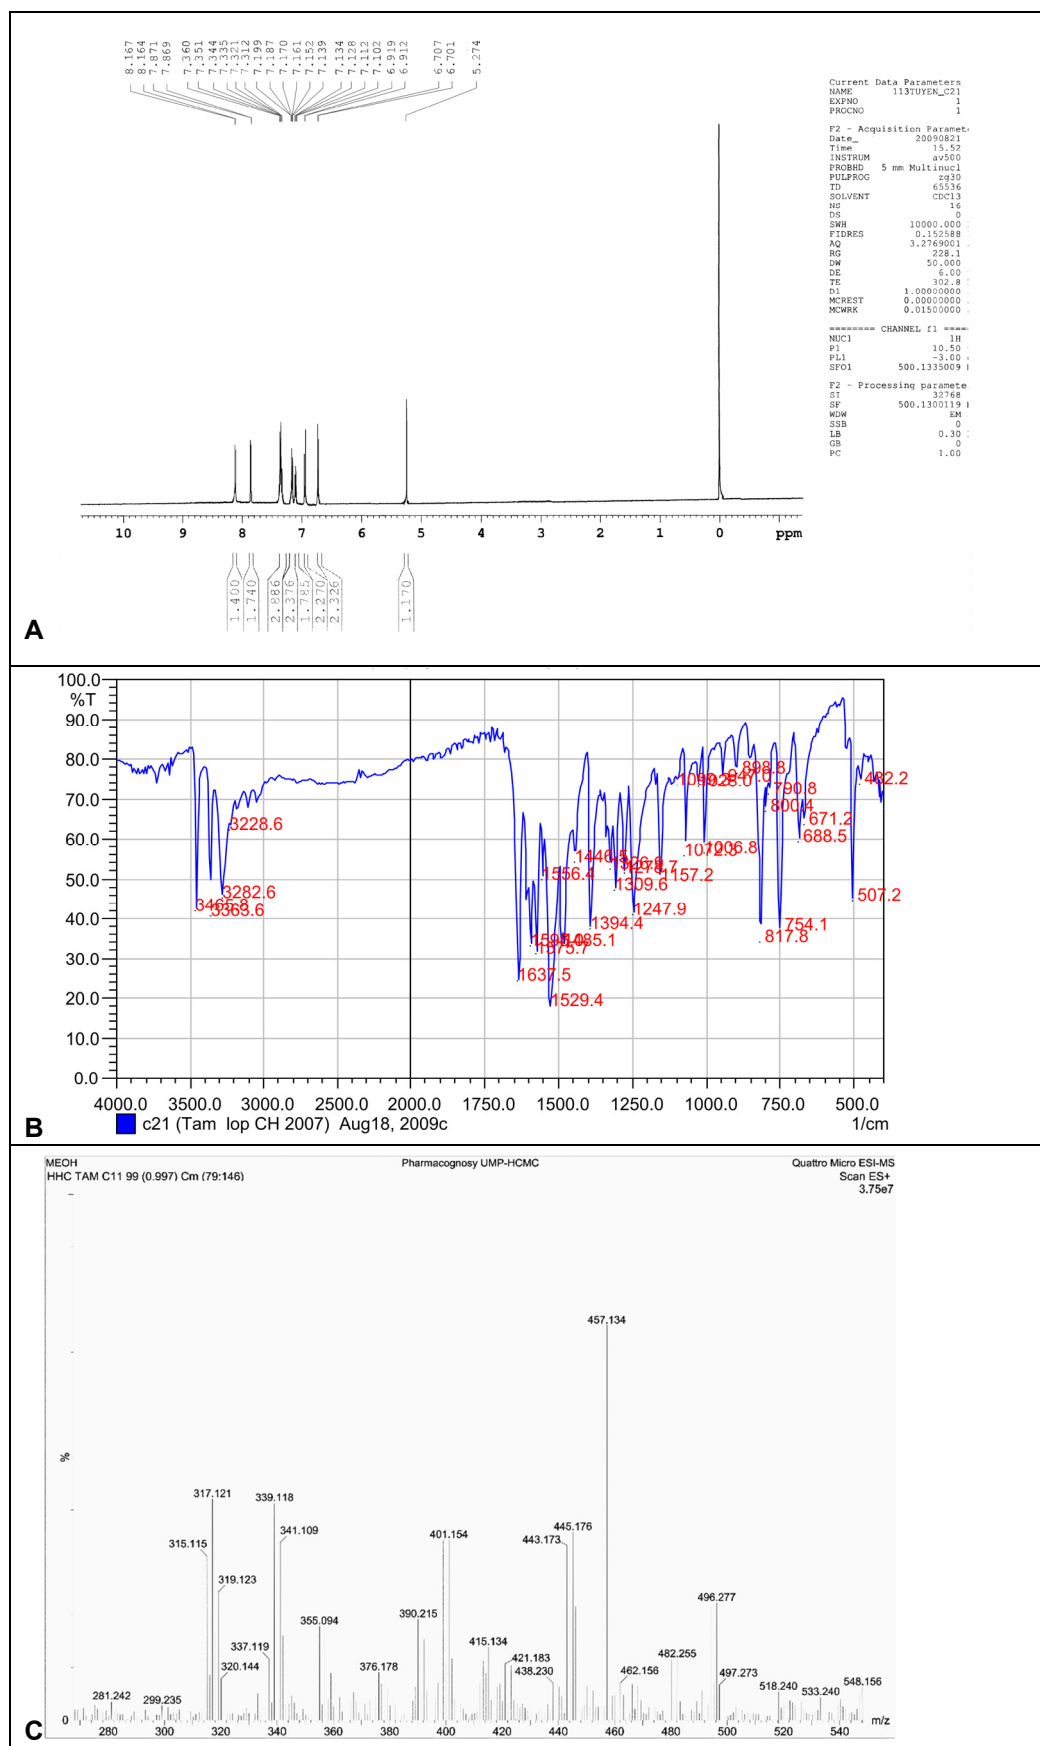

**Figure S14.**  $^1\text{H}$ -NMR, IR, and MS spectra of 2-(di(1H-imidazol-1-yl)methyl)-3-(p-bromophenyl)-4(3H)-quinazolinone (**3m**)

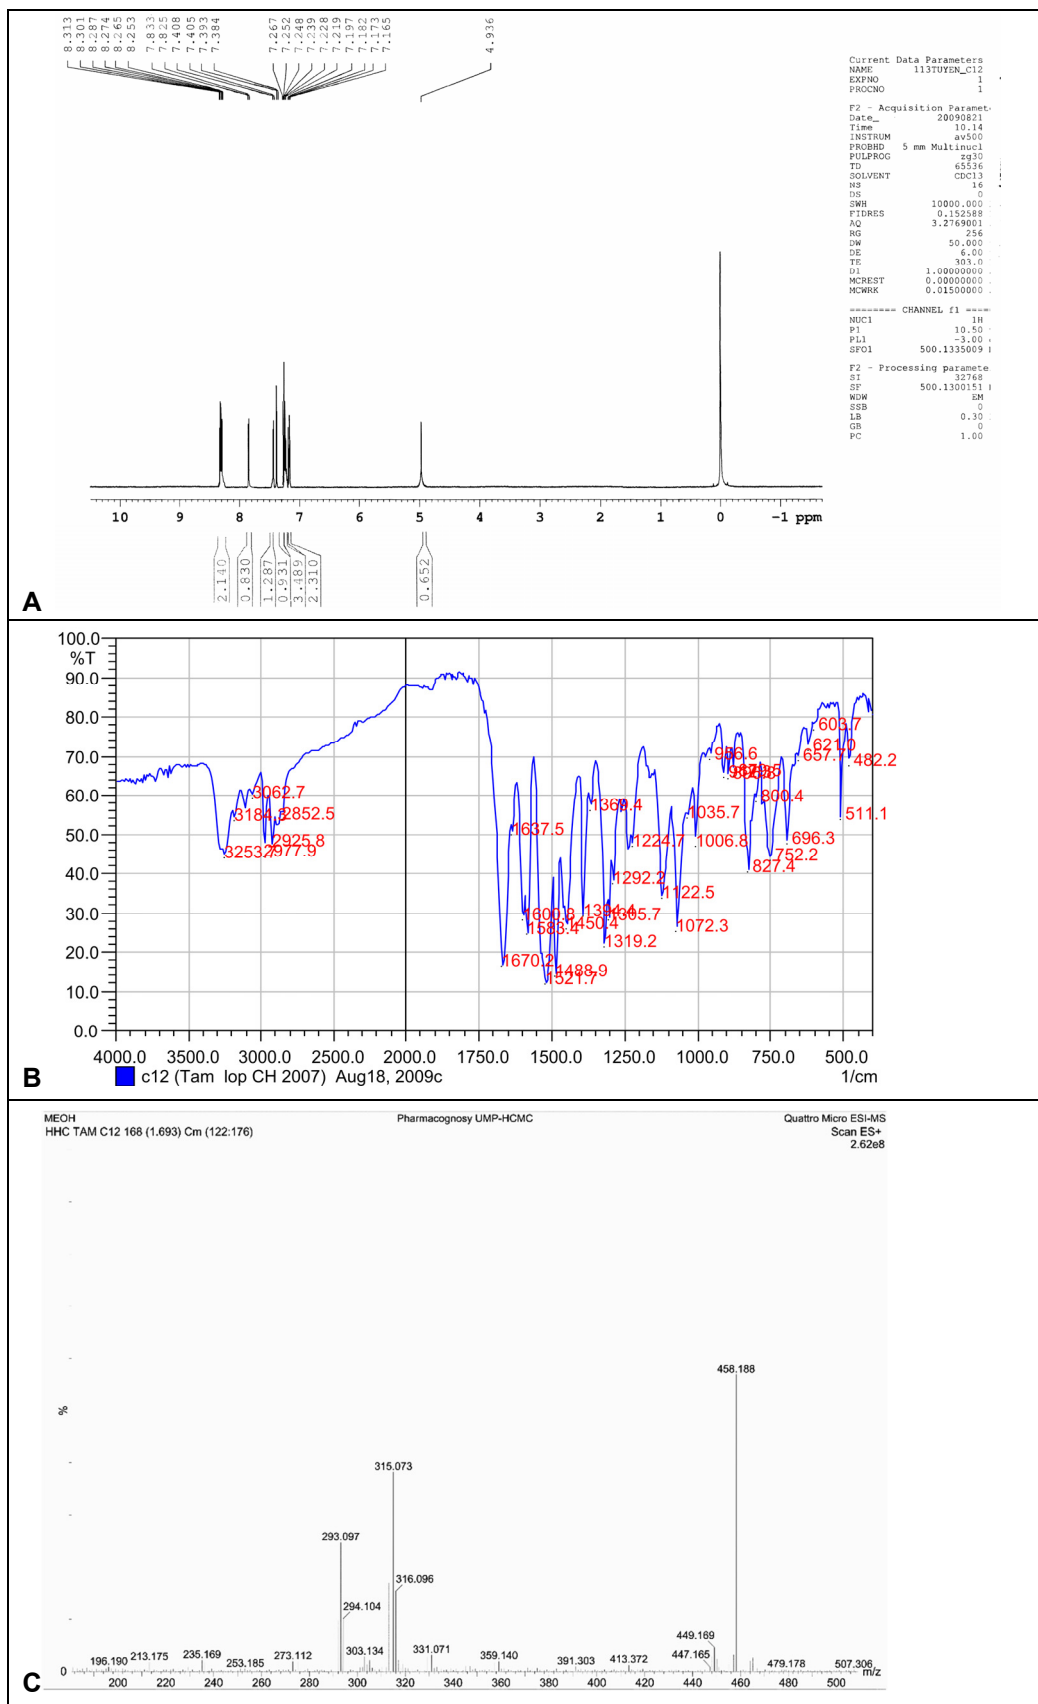

**Figure S15.**  $^1\text{H}$ -NMR, IR, and MS spectra of 2-(bromo-(1H-triazol-1-yl)methyl)-3-(pbromophenyl)-4(3H)-quinazolinon (**30**)

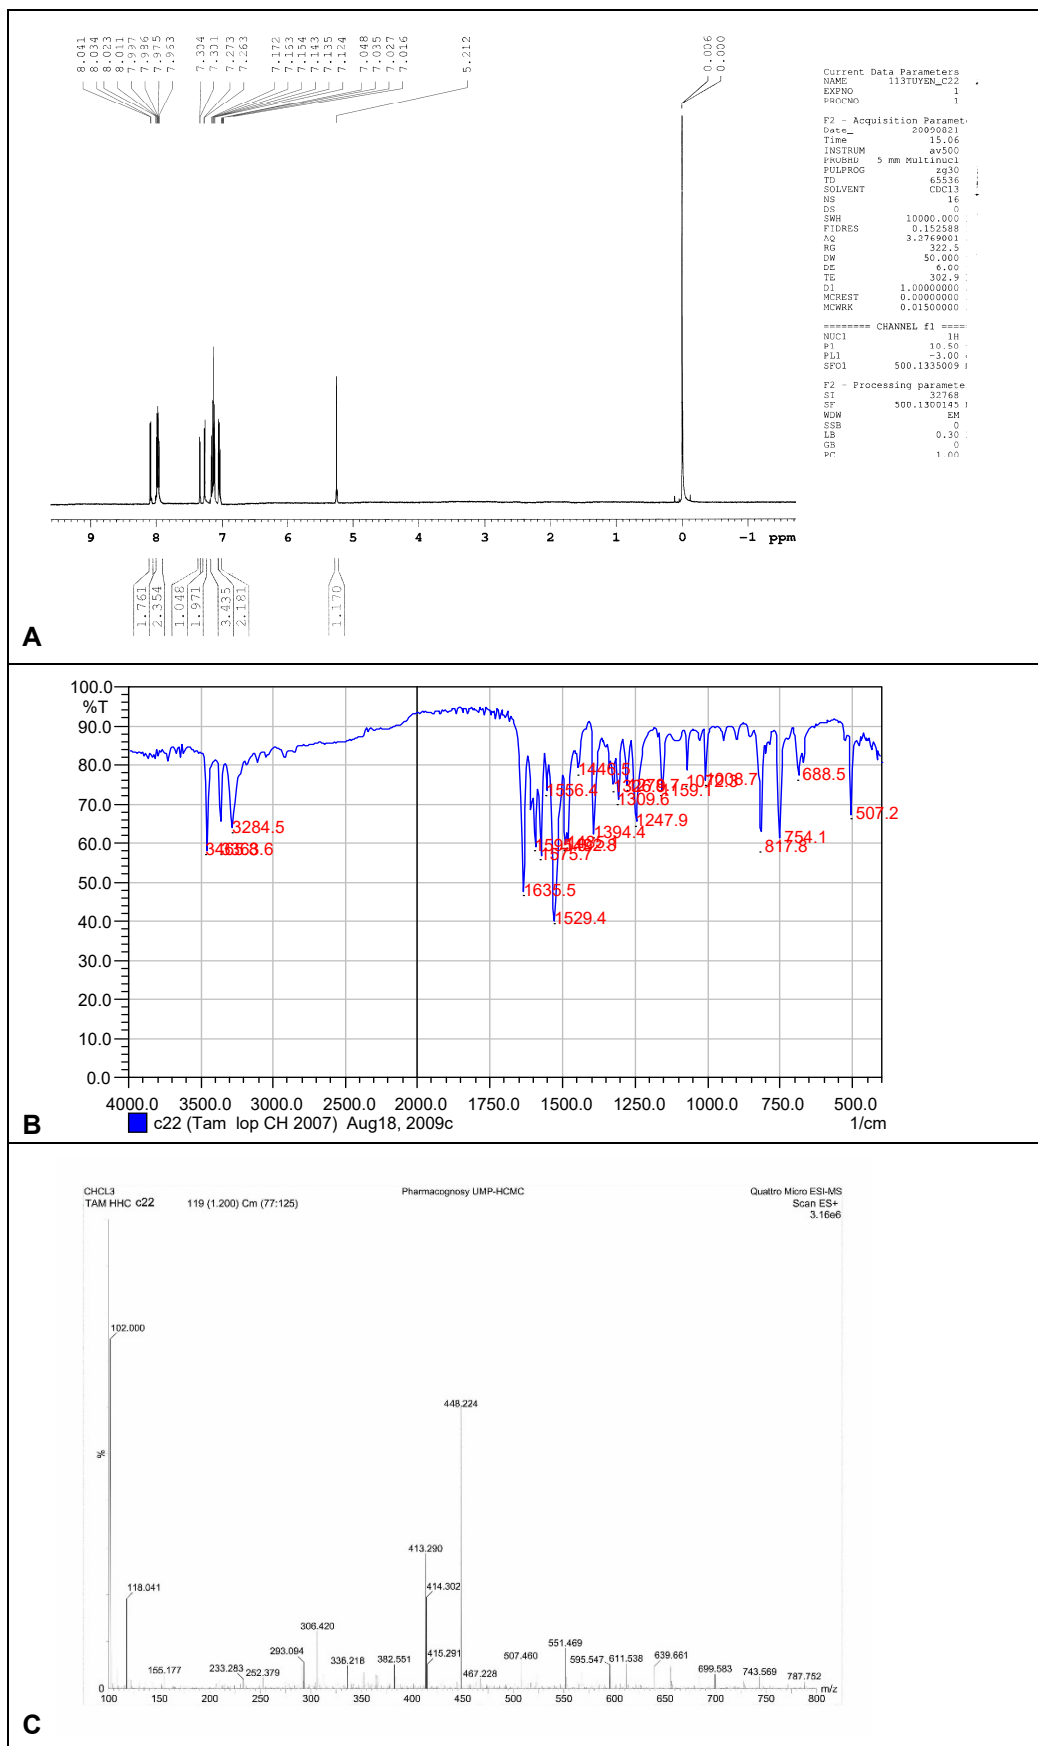

Figure S16.  $^1\text{H}$ -NMR, IR, and MS spectra of 2-(di(1H-triazol-1-yl)methyl)-3-(*p*-bromophenyl)-4(3H)-quinazolinon (3p)



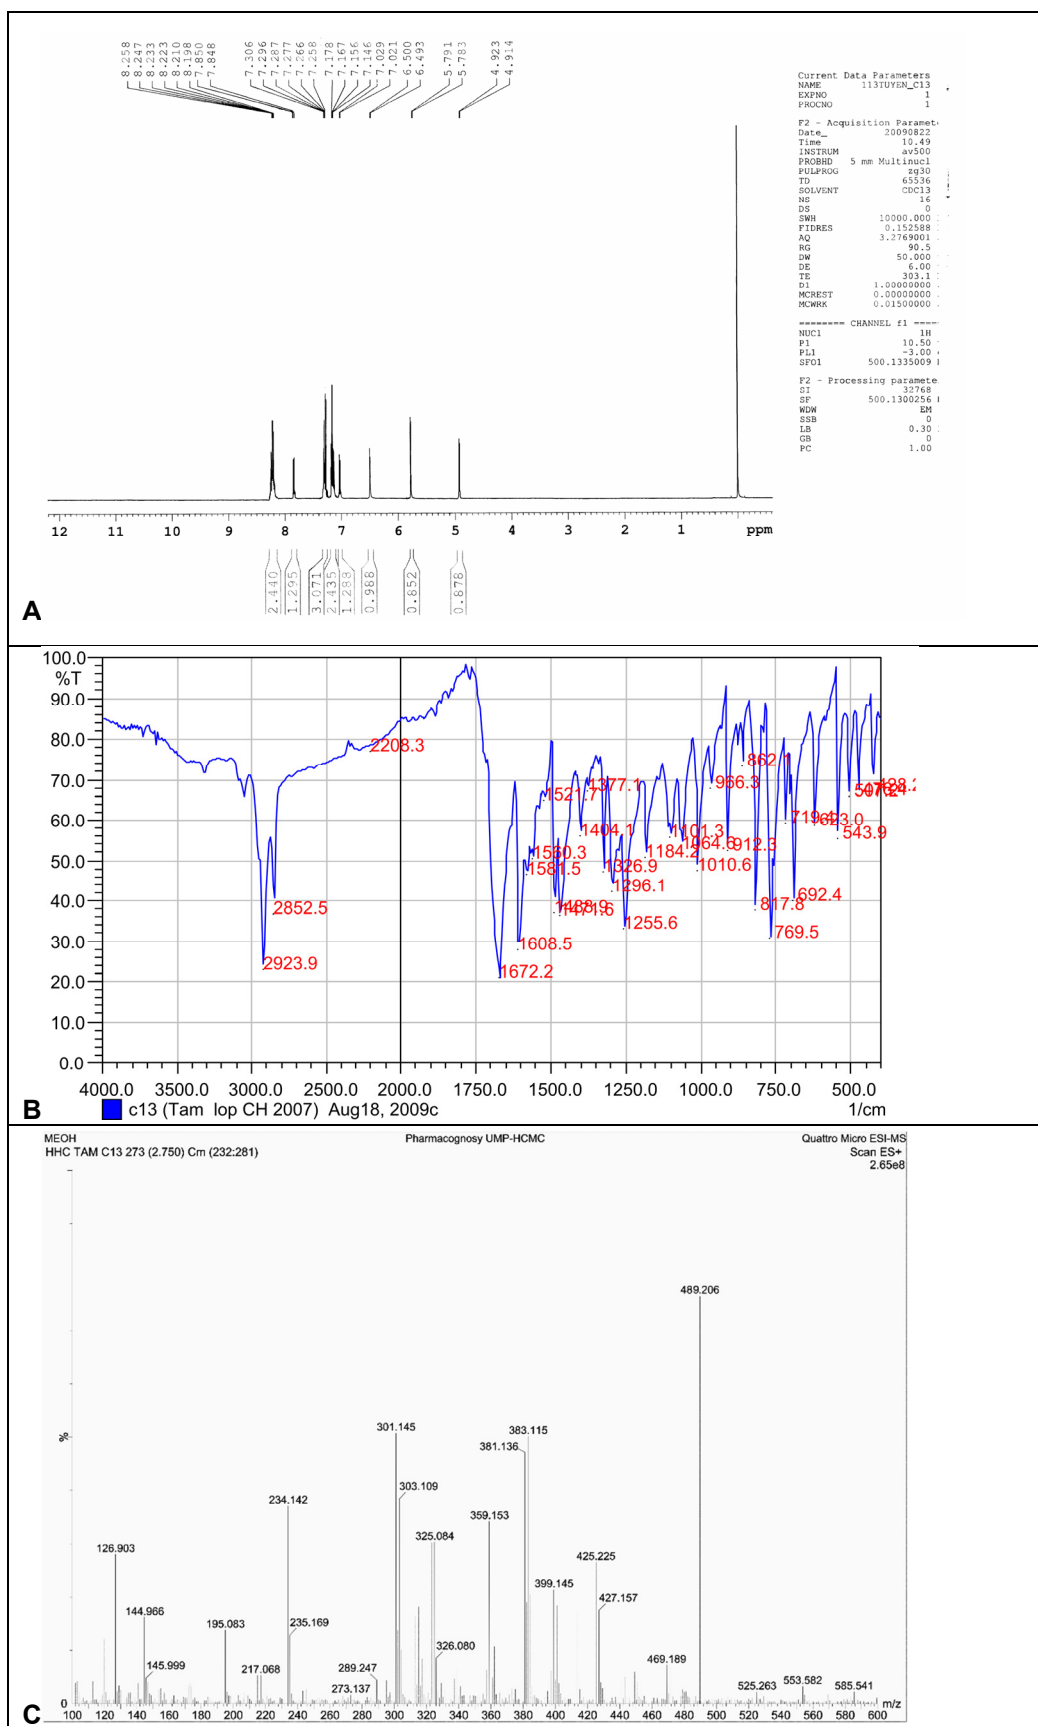

Figure S17.  $^1\text{H}$ -NMR, IR, and MS spectra of 2-(bromo-(thiazol-2-ylamino)methyl)-3-(p-bromophenyl)-4(3H)-quinazolinon (**3q**)

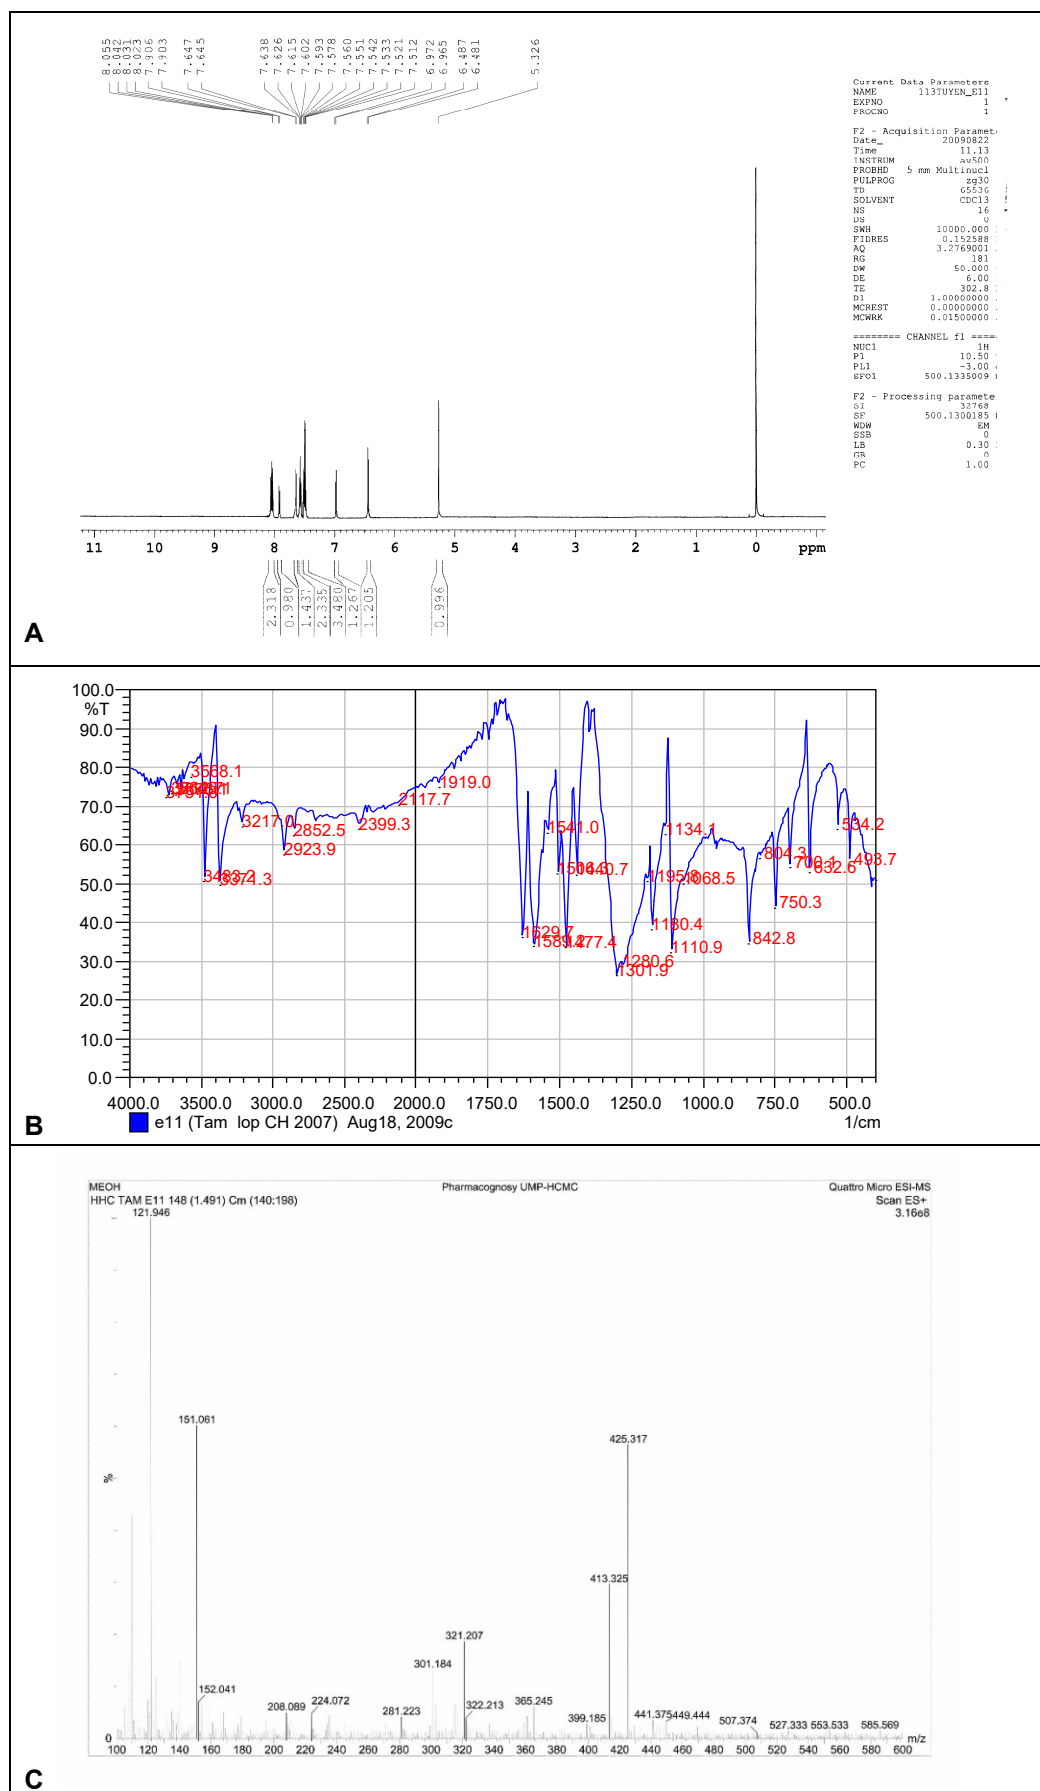

**Figure S18.**  $^1\text{H}$ -NMR, IR, and MS spectra of 2-(bromo-(1H-imidazol-1-yl)methyl)-3-(*p*-nitrophenyl)-4(3*H*)-quinazolinon (**3r**)

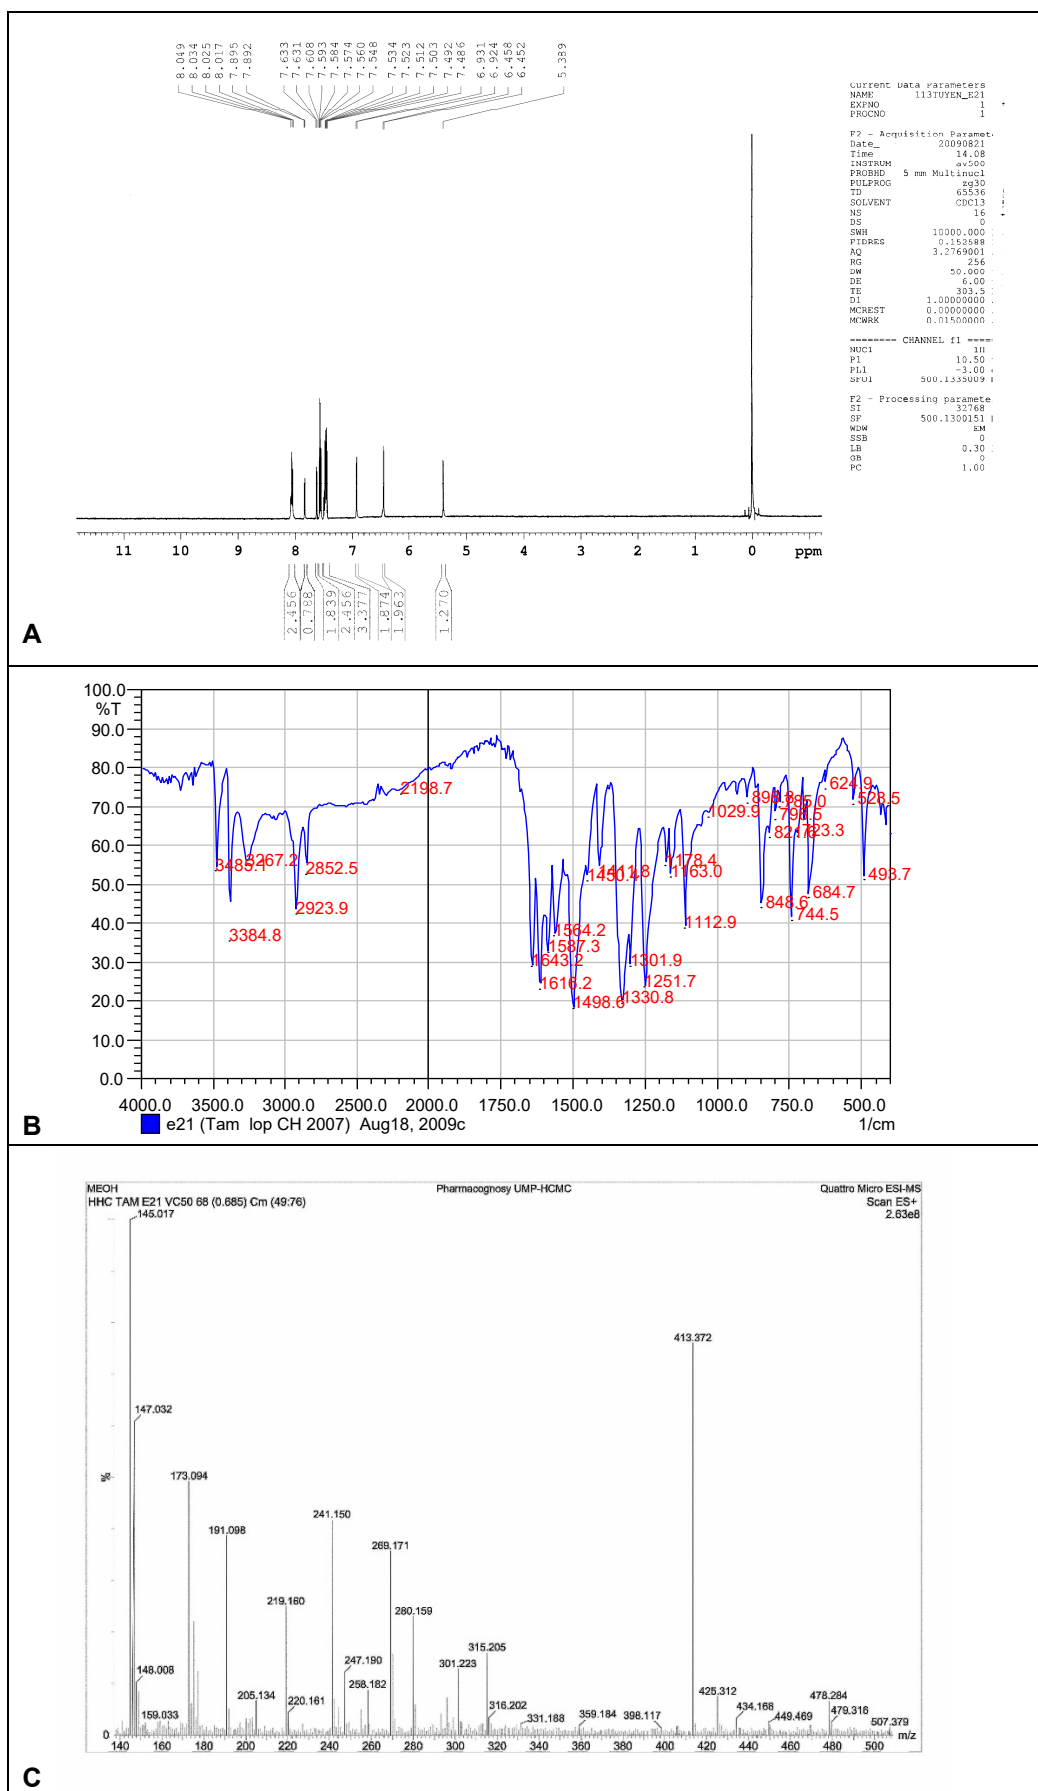

**Figure S19.**  $^1\text{H}$ -NMR, IR, and MS spectra of 2-(di(1H-imidazol-1-yl)methyl)-3-(*p*-nitrophenyl)-4(3H)-quinazolinon (**3s**)
